# Supplementary material for: Titanium-decorated graphene oxide for carbon monoxide capture and separation
Source: Royal Society of Chemistry journal article supplement (doi:10.1039/c1cp21778j), 2011-01-01
Supplement: c1cp21778j.pdf [file c1cp21778j.pdf]

**Supporting Information for**  
**Titanium-decorated Graphene Oxide for Carbon Monoxide**  
**Capture and Separation**

**Lu Wang<sup>1,2</sup>, Jijun Zhao<sup>1,2</sup>, Lili Wang<sup>1,2</sup>, Tianyin Yan<sup>3</sup>, Yi-Yang Sun<sup>4</sup>, Shengbai B. Zhang<sup>4</sup>**

<sup>1</sup>*Key Laboratory of Materials Modification by Laser, Ion and Electron Beams (Dalian University of Technology), Ministry of Education, Dalian 116024, China*

<sup>2</sup>*College of Advanced Science and Technology, Dalian University of Technology, 116024, China*

<sup>3</sup>*Institute of New Energy Material Chemistry, Nankai University, Tianjin 300071, China*

<sup>4</sup>*Department of Physics, Applied Physics, and Astronomy, Rensselaer Polytechnic Institute, Troy, NY 12180, USA*

**Table S1** Adsorption energies ( $E_b$ ) for CO, N<sub>2</sub>, CO<sub>2</sub> and CH<sub>4</sub> on graphene are calculated by structural optimization with Drieding Force Field and compared to the experiments (graphite by expt.). Graphene is modeled by a finite molecule with 54 C atoms.

| Gas             | $E_b$ (meV) | Method    |
|-----------------|-------------|-----------|
| CH <sub>4</sub> | 140         | Expt. [a] |
|                 | 142.35      | Drieding  |
| CO              | 109.6       | Expt. [b] |
|                 | 127.12      | Drieding  |
| N <sub>2</sub>  | 100.9       | Expt. [b] |
|                 | 114.89      | Drieding  |
| CO <sub>2</sub> | 178.4       | Expt. [c] |
|                 | 183.43      | Drieding  |

**References:**

[a] E.S. Severin and D.J. Tildesley, *Mol. Phys.* 41 (1980) 1401.

[b] M.J. Bojan and W.A. Steele, *Langmuir* 3 (1987) 1123.

[c] R.A. Beebe, A.V. Kiselev, N.V. KovaIeva, J.R. Holmes and M.E.R. CampIin, *Russ. J. Phys. Chem.* 38 (1964) 506.

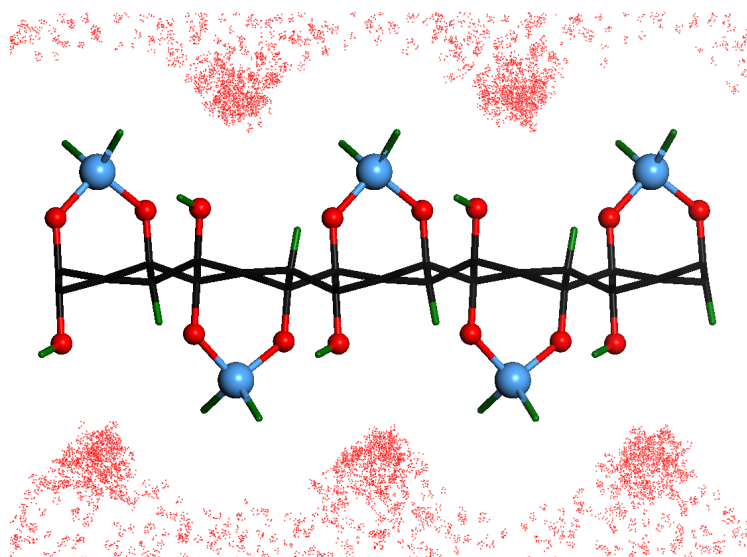

**Fig. S1** Density distribution for CO<sub>2</sub> molecules on the Ti-decorated GO at 298 K and 10 bar using GCMC method (The red points are the centers-of-mass of the adsorbed CO<sub>2</sub> molecules). CO<sub>2</sub> molecules mostly distribute on the GO surface instead of Ti atoms.

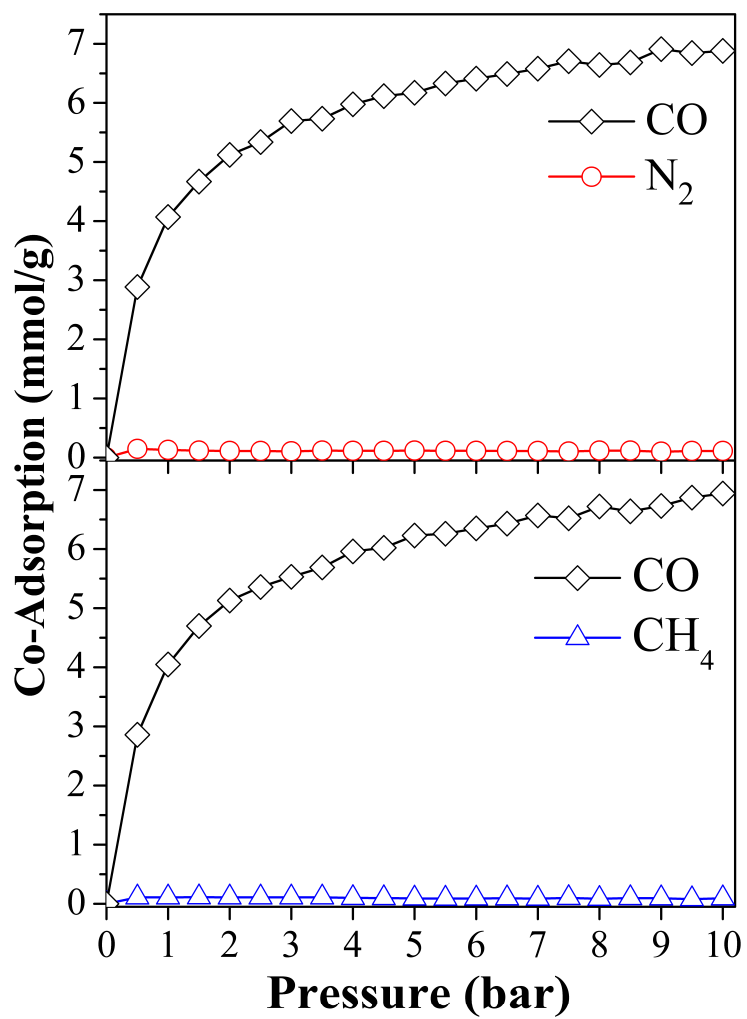

**Fig. S2** Co-adsorption isotherms of CO/N<sub>2</sub> and CO/CH<sub>4</sub> gas mixtures at the temperature of 298 K from 0 to 10 bar.
